# Supplementary material for: Using the Biology Card Sorting Task to Measure Changes in Conceptual Expertise during Postsecondary Biology Education
Source: Atypon-hosted journal article supplement (doi:10.1187/cbe.16-09-0273), 2017-02-17
Supplement: combinedsupmats.pdf [file combinedsupmats.pdf]

# Supplemental Material

*CBE—Life Sciences Education*

**Bissonnette et al.**

**Table S1 Examples of included and excluded terms for coding deep feature card group names**

| <b>Pathways and Transformation of Energy and Matter</b>                                             |                                                       | <b>Storage and Passage of Information About How to Build Living Systems</b>                                                                    |                                                                                          | <b>Relationships Between Structure and Function</b>                                                                                                                         |                                          | <b>Evolution by Natural Selection</b>                                                                                |                                                                                       |
|-----------------------------------------------------------------------------------------------------|-------------------------------------------------------|------------------------------------------------------------------------------------------------------------------------------------------------|------------------------------------------------------------------------------------------|-----------------------------------------------------------------------------------------------------------------------------------------------------------------------------|------------------------------------------|----------------------------------------------------------------------------------------------------------------------|---------------------------------------------------------------------------------------|
| <b>Included Terms</b>                                                                               | <b>Excluded Terms</b>                                 | <b>Included Terms</b>                                                                                                                          | <b>Excluded Terms</b>                                                                    | <b>Included Terms</b>                                                                                                                                                       | <b>Excluded Terms</b>                    | <b>Included Terms</b>                                                                                                | <b>Excluded Terms</b>                                                                 |
| Any title that has the term "energy," Metabolism, Nutrient production and use, Cellular respiration | ATP, Photosynthesis, Glycolysis, Cellular consumption | DNA: the genetic blueprint for organisms, DNA/traits, Inheritance, Genetics, Cell division/ phenotypes as a result, Passing genes to offspring | DNA and ATP, DNA sequences, Reproduction, Genetic makeup, Genetic variability, Offspring | Structure and Function, Parts and function, Biomechanics, Functional Morphology, Cellular organization and function, Cell structure purpose, Characteristics and mechanisms | Morphology, Tissues, Structure, Function | Any title that has the word "Evolution," Natural selection, Survival of the fittest, Adaptation, Selective pressures | Introduction of new species, Difference in organisms over time, Resistance, Darwinism |

Note: Many of the "Excluded Terms" were excluded because they mimicked the exact language from the cards.
